# Supplementary material for: Factors Associated with Carriage of Enteropathogenic and Non-Enteropathogenic Viruses: A Reanalysis of Matched Case-Control Data from the AFRIBIOTA Site in Antananarivo, Madagascar
Source: MDPI journal article supplement (doi:10.3390/pathogens12081009), 2023-08-02
Supplement: s1 [file s1]

## Supplementary materials

**Supplementary Table S1.** List of primers and probes

| Targeted viruses              | Forward primer                                                | Reverse primer             | Probe                         | Fluorophore <sup>1</sup> | Target gene / Access number- GenBank    | Reference       |
|-------------------------------|---------------------------------------------------------------|----------------------------|-------------------------------|--------------------------|-----------------------------------------|-----------------|
| Adenovirus-pan                | GCCACGGTGGGGTTTCTAACTT                                        | GCCCCAGTGGTCTTACATGCACATC  | TGCACCAGACCCGGGCTCAGGTACTCCGA | FAM-BHQ1                 | Hexon/ J01917                           | Elfving K, 2014 |
| Adenovirus 40/41 <sup>2</sup> | TGCCCGCGCCACCGAT                                              | GAGCCACAGTGGGGTTTCTG       | CCAGGCTGAAGTACG               | FAM-BHQ1                 | Hexon/ X51782                           | Elfving K, 2014 |
| Rotavirus                     | (1) AACCATCTACATGACCCTCTATGA<br>(2) AACCATCTTCAGTAACCCTCTATGA | GGTCACATAACGCCCTATAGC      | CAATAGTTAAAAGCTAACACTGTCAA    | FAM-TAMRA                | Nonstructural protein 3 (NSP3) / X81436 | Elfving K, 2014 |
| Astrovirus                    | GACTGCWAAGCAGCTTCGTGA                                         | GCTAGCCATCACACTTCTTTGGTCCT | TCACAGAAGAGCAACTCCATCGCATTG   | Cy5-BHQ1                 | Pol-capsid junction/ NC_001943          | Elfving K, 2014 |
| Norovirus GII                 | TGGAYTTTTAYGTGCCAG                                            | CGACGCCATCTTCATTCAC        | AGCCAGATTGCGATCGCCC           | VIC-BHQ1                 | Pol-capsid junction/ X86557             | Elfving K, 2014 |

<sup>1</sup>probe labeled with fluorophores: FAM, 6-carboxyfluorescein; VIC, 4,7,2-trichloro-7-phenyl-6-carboxyfluorescein; Cy5, 1,1'-dimethyl-3,3',3'-tetramethylindocarbocyanine; TAMRA, 6-carboxytetramethylrhodamine; BHQ1, Black Hole Quencher 1.

<sup>2</sup> Run separately as a complementary analysis.

**Supplementary Table S2.** Association of the growth status of children with adenovirus type F40/41 infection.

|                      | NS or controls<br>(N=111) | MS<br>(N=47) | SS<br>(N=41) | Overall<br>(N=199) | <i>p-value*</i> |
|----------------------|---------------------------|--------------|--------------|--------------------|-----------------|
| Adenovirus type40/41 |                           |              |              |                    | 0.72            |
| No                   | 96 (86.5%)                | 43 (91.5%)   | 37 (90.2%)   | 176 (88.4%)        |                 |
| Yes                  | 15 (13.5%)                | 4 (8.5%)     | 4 (9.8%)     | 23 (11.6%)         |                 |

NS or controls: Non-stunted; MS: moderately stunted; SS: severely stunted; N: total number of samples analyzed; Comparison between groups (controls and stunted children MS+SS) were determined using Fisher's exact test according to their conditions of use. \*A p-value < 0.05 was considered statistically significant

## Supplementary materials

**Supplementary Table S3.** Correlation of adenovirus non-type F40/41 carriage with clinical symptoms observed in the study population (N=251).

|                      | Adenovirus detection |                    |                   | <i>p</i> -value    |
|----------------------|----------------------|--------------------|-------------------|--------------------|
|                      | No (N=159)           | Yes (N=92)         | Total (N=251)     |                    |
|                      | n (%)/median [IQR]   | n (%)/median [IQR] | n/median [IQR]    |                    |
| <b>Age</b>           |                      |                    |                   | 0.540 <sup>1</sup> |
| Median               | 44.3 [34.8. 53.1]    | 43.4 [32.8. 52.3]  | 43.2 [33.6. 52.9] |                    |
| <b>Growth status</b> |                      |                    |                   | 0.466 <sup>2</sup> |
| Non-stunted          | 52 (38.8)            | 82 (61.2)          | 134               |                    |
| Moderately stunted   | 19 (30.1)            | 44 (69.8)          | 63                |                    |
| Severely stunted     | 21 (38.9)            | 33 (61.1)          | 54                |                    |
| <b>Stuffy nose</b>   |                      |                    |                   | 0.111 <sup>2</sup> |
| Yes                  | 84 (68.3)            | 39 (31.7)          | 123               |                    |
| No                   | 75 (58.6)            | 53 (41.4)          | 128               |                    |
| <b>Rhinorrhea</b>    |                      |                    |                   | 0.066 <sup>2</sup> |
| Yes                  | 105 (67.7)           | 50 (32.2)          | 155               |                    |
| No                   | 54 (56.3)            | 42 (43.7)          | 96                |                    |
| <b>Cough</b>         |                      |                    |                   | 0.102 <sup>2</sup> |
| Yes                  | 63 (70.0)            | 27 (30.0)          | 90                |                    |
| No                   | 96 (59.6)            | 65 (40.4)          | 161               |                    |

<sup>1</sup> Chi square-test. <sup>2</sup> Wilcoxon-Mann-Whitney test.

## Supplementary materials

**Supplementary Table S4.** Sensitivity and specificity of the final model.

| Predicted | Actual |     |
|-----------|--------|-----|
|           | No     | Yes |
| No        | 113    | 77  |
| Yes       | 36     | 78  |

Sensitivity of the model: 50.3%, IC 95% (42.2 - 58.4); Specificity of the model: 75.8%, IC 95% (68.2 - 82.5)

**Supplementary Table S5.** Bivariate analysis of risk factors statistically associated with viral carriage (p-value < 0.20).

[illegible]
